# Supplementary material
Source: PubMed Central journal article supplement (PMC4833724)
Supplement: NIHMS720691-supplement-01.pdf [file NIHMS720691-supplement-01.pdf]

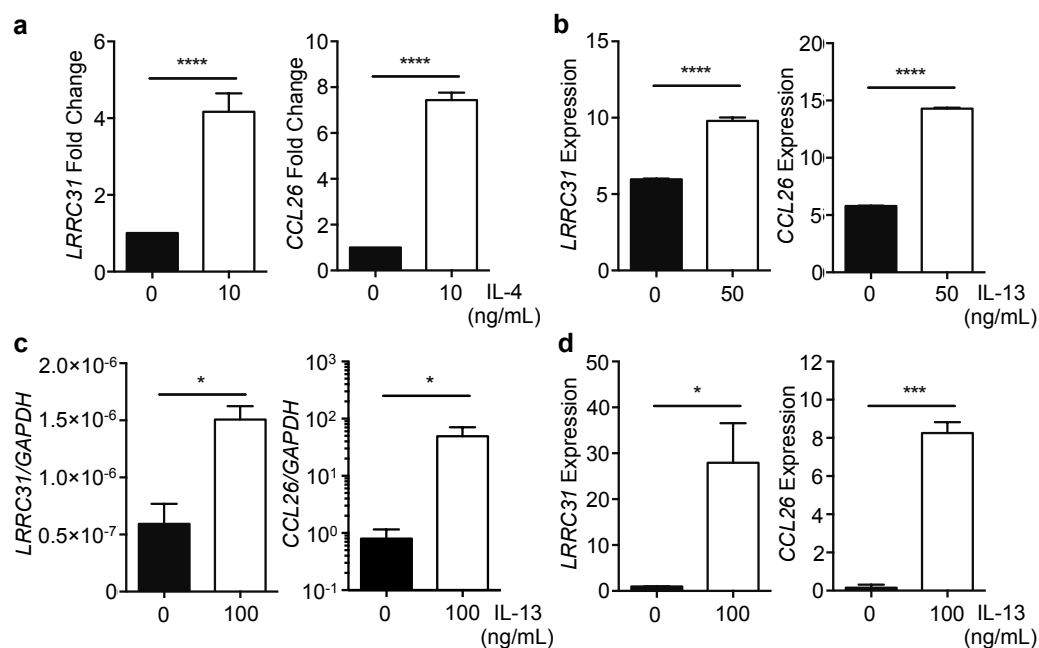

**Supplemental Figure 1 | *LRRC31* expression in esophageal epithelial cells.** **a**, Fold change in normalized *LRRC31* and *CCL26* mRNA expression in bronchial epithelial cells treated with IL-4 (10 ng/mL) for 18 hours determined by microarray gene expression analysis.<sup>17</sup> **b**, Normalized *LRRC31* and *CCL26* mRNA expression in tracheal epithelial cells treated with IL-13 (50 ng/mL) for 23 days determined by microarray gene expression analysis.<sup>18</sup> **c**, Normalized *LRRC31* and *CCL26* mRNA expression in Caco2-bbe colonic epithelial cells treated with IL-13 (100 ng/mL) for 48 hours determined by microarray gene expression analysis. **d**, Normalized *LRRC31* and *CCL26* mRNA expression in esophageal epithelial cells treated with IL-13 (100 ng/mL) for 48 hours determined by microarray gene expression analysis. For **a-d**, data are represented as the mean  $\pm$  SEM; \* $P < 0.05$ , \*\*\* $P < 0.001$ , \*\*\*\* $P < 0.0001$ .

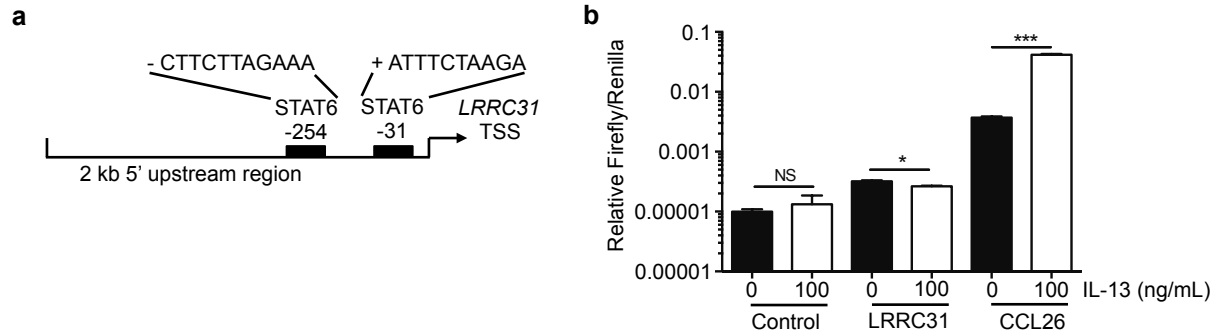

**Supplemental Figure 2 | IL-13–STAT6 effect on *LRRC31* gene promoter activity.** **a**, Identification of putative STAT6 binding sites within the 2 kb 5' upstream region of the *LRRC31* transcription start site (TSS) from publicly available ChIP-Seq data.<sup>19</sup> **b**, Normalized luciferase activity in empty vector control, *LRRC31* gene promoter (*LRRC31*), and *CCL26* gene promoter (*CCL26*) transfected TE-7 esophageal epithelial cells treated with IL-13 (100 ng/ml) for 48 hours. A representative experiment is shown (n = 3). For **b**, data are represented as the mean  $\pm$  SEM; NS, not significant; \* $P < 0.05$ , \*\*\* $P < 0.001$ .

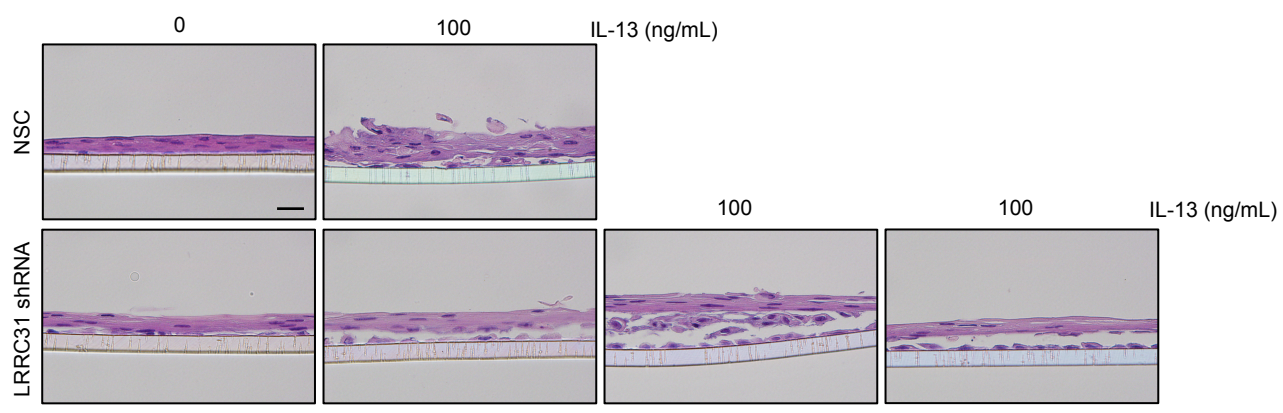

**Supplementary Figure 3 | *LRRC31* gene-silenced EPC2s.** Additional images of H&E-stained sections from differentiated NSC and LRRC31 shRNA EPC2s at day 14.

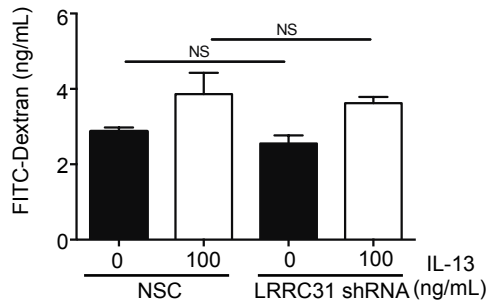

**Supplemental Figure 4 | Paracellular flux measurements in *LRR31* gene silenced, differentiated EPC2 cells.** FITC-dextran (3-5 kD) paracellular flux measured at 3 hours after FITC-dextran was added to luminal surface of differentiated NSC and LRR31 shRNA EPC2s at day 14. A representative experiment is shown (n = 3). Data are represented as the mean  $\pm$  SEM; NS, not significant.

**a**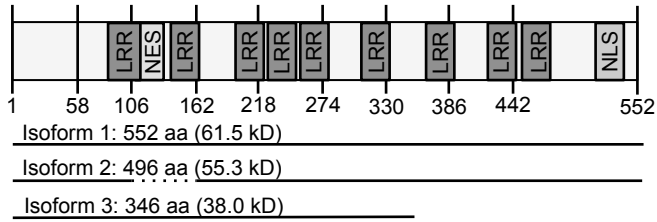**b**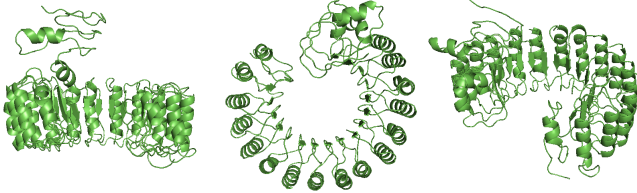

**Supplementary Figure 5 | LRRC31 structure. a,** Representation of LRRC31 protein amino acid primary sequence with 9 exons indicated and putative domains (LRR, leucine-rich repeat; NES, nuclear export signal; NLS, nuclear localization signal).<sup>25,26</sup> **b,** Images representing predicted tertiary structure of LRRC31 generated using I-TASSER Online Protein Structure and Function Predictions.<sup>27</sup>

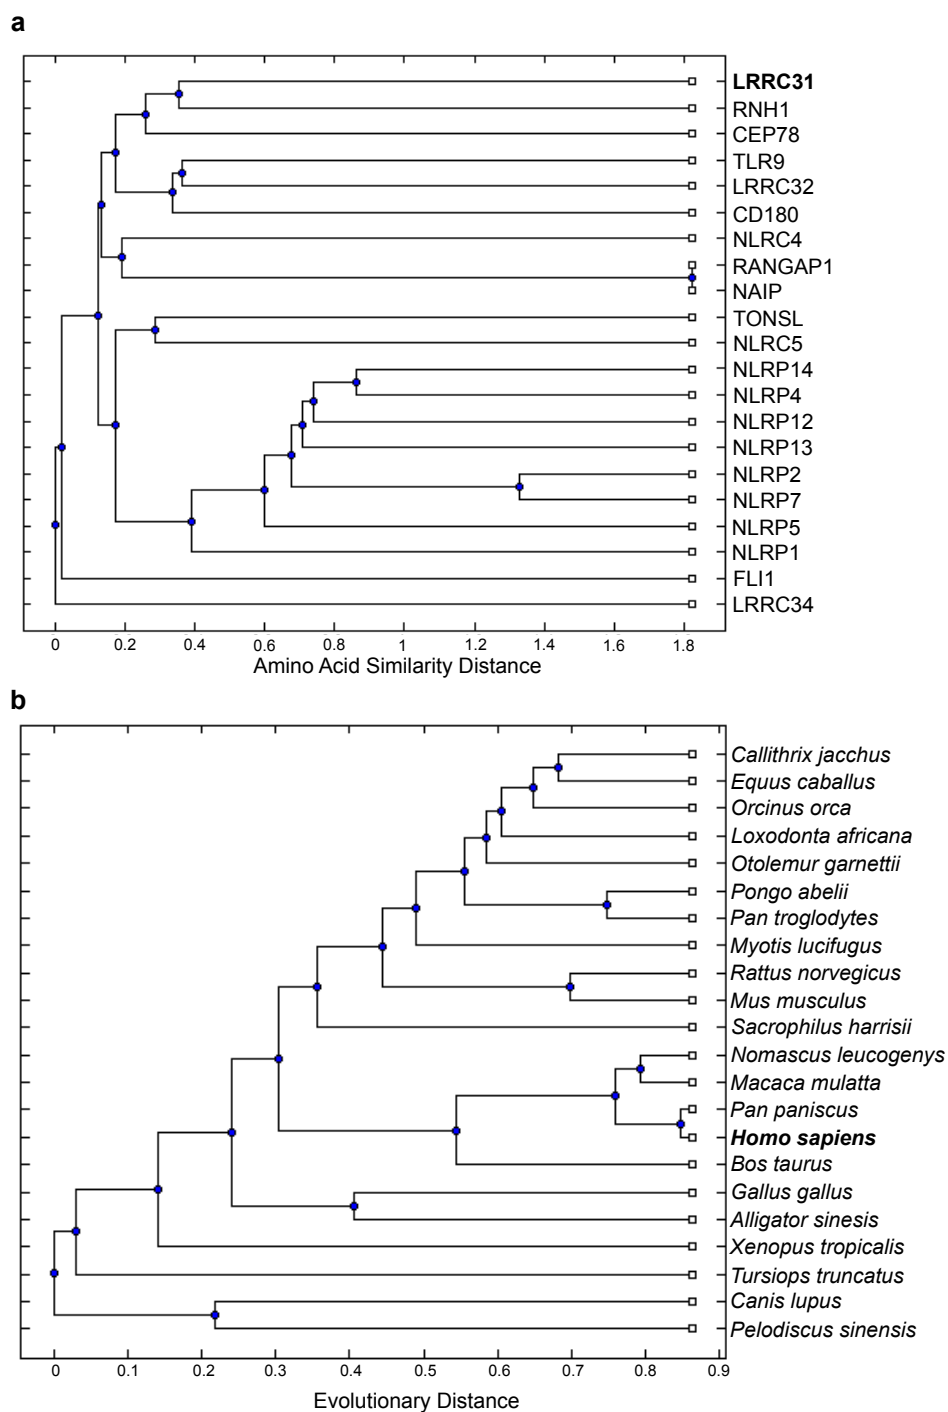

**Supplementary Figure 6 | LRR31 homology and phylogeny.** **a**, Analysis of LRR31 amino acid similarity to pBLAST-predicted homologous human proteins using Jukes Cantor modeling.<sup>28</sup> **b**, Analysis of LRR31 amino acid similarity to eggNOG-predicted orthologous proteins using Jukes Cantor modeling.<sup>33</sup>

Supplementary Table 1

| Gene          | Amplicon | Forward Primer               | Reverse Primer               |
|---------------|----------|------------------------------|------------------------------|
| <i>GAPDH</i>  | 351 bp   | TGGAAATCCCATCACCATCT         | GTCTTCTGGGTGGCAGTGAT         |
| <i>CCL26</i>  | 151 bp   | AACTCCGAAACAATTGTA CT CAGCTG | GTA ACTCTGGGAGGAAACACCCTCTCC |
| <i>LRRC31</i> | 131 bp   | CAAAAGAGTGTCAAAATATTGGATG    | TGCTTTAGCATGACCAACTGA        |
| <i>KRT10</i>  | 126 bp   | AGCATGGCAACTCACATCAG         | TGTCGATCTGAAGCAGGATG         |
| <i>KLK1</i>   | 89 bp    | GTGCTCACAGCTGCTCATTG         | AACTGGGCTGTGTTTTCGTC         |
| <i>KLK5</i>   | 155 bp   | AGTCAGAAAAGGTGCGAGGA         | TAATCTCCCCAGGACACGAG         |
| <i>KLK7</i>   | 122 bp   | CGTCCTGGTCAATGAGCG           | ACTTCGAGGCCTTGATCCTC         |
| <i>KLK11</i>  | 101 bp   | CACCAGCTGCCTCATTTCC          | TCTGGTGCTCAATGATGGTG         |
| <i>KLK13</i>  | 82 bp    | CCTAGTGATCGCCTCCCTG          | GGTCCCATTGGTGTTGAGAA         |
